# Supplementary material
Source: PubMed Central journal article supplement (PMC2535797)

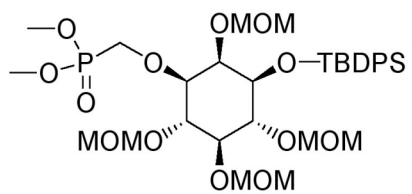

6

$^1\text{H}$  NMR in  $\text{CDCl}_3$

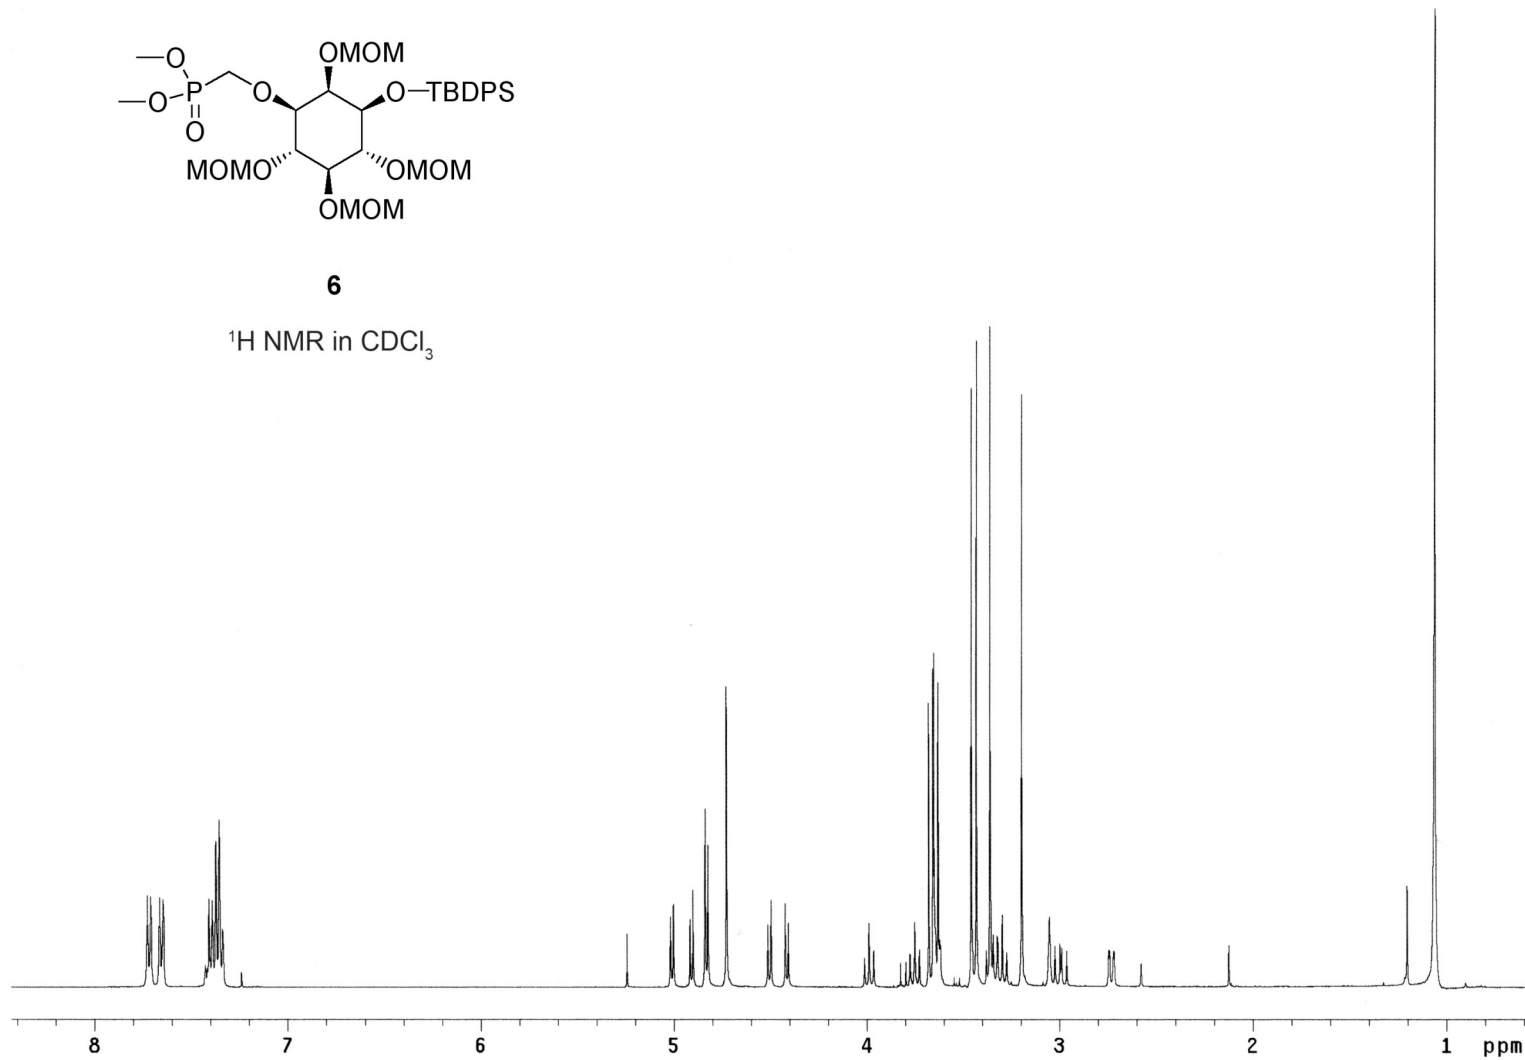



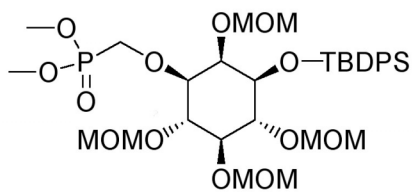

6

$^{31}\text{P}$  NMR in  $\text{CDCl}_3$

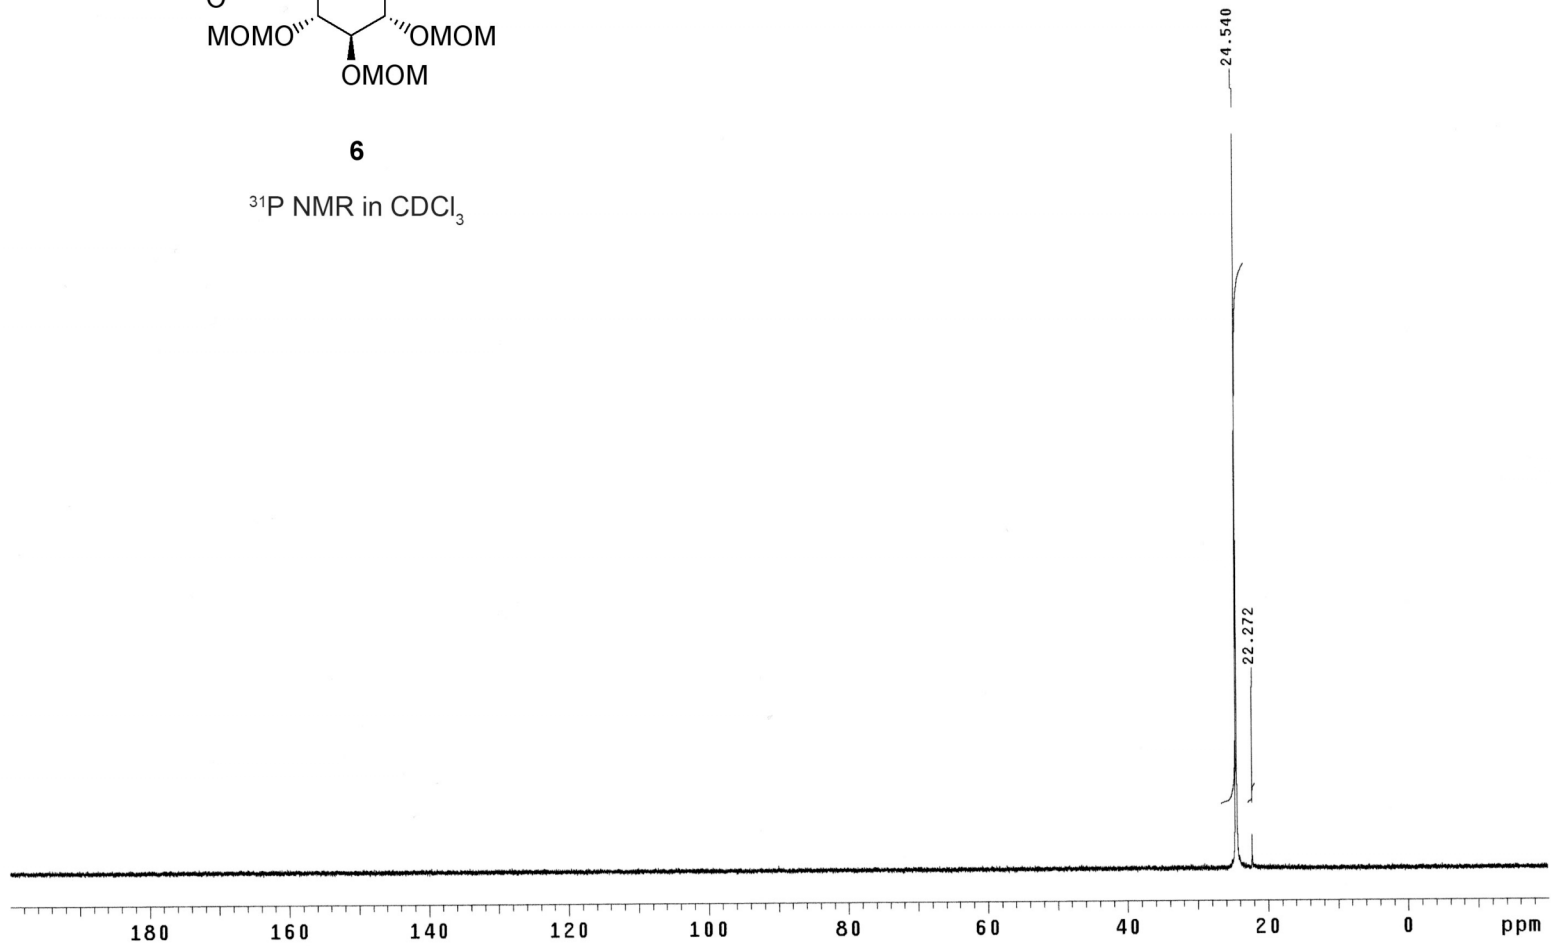

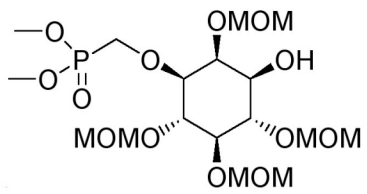

7

<sup>1</sup>H NMR in CDCl<sub>3</sub>

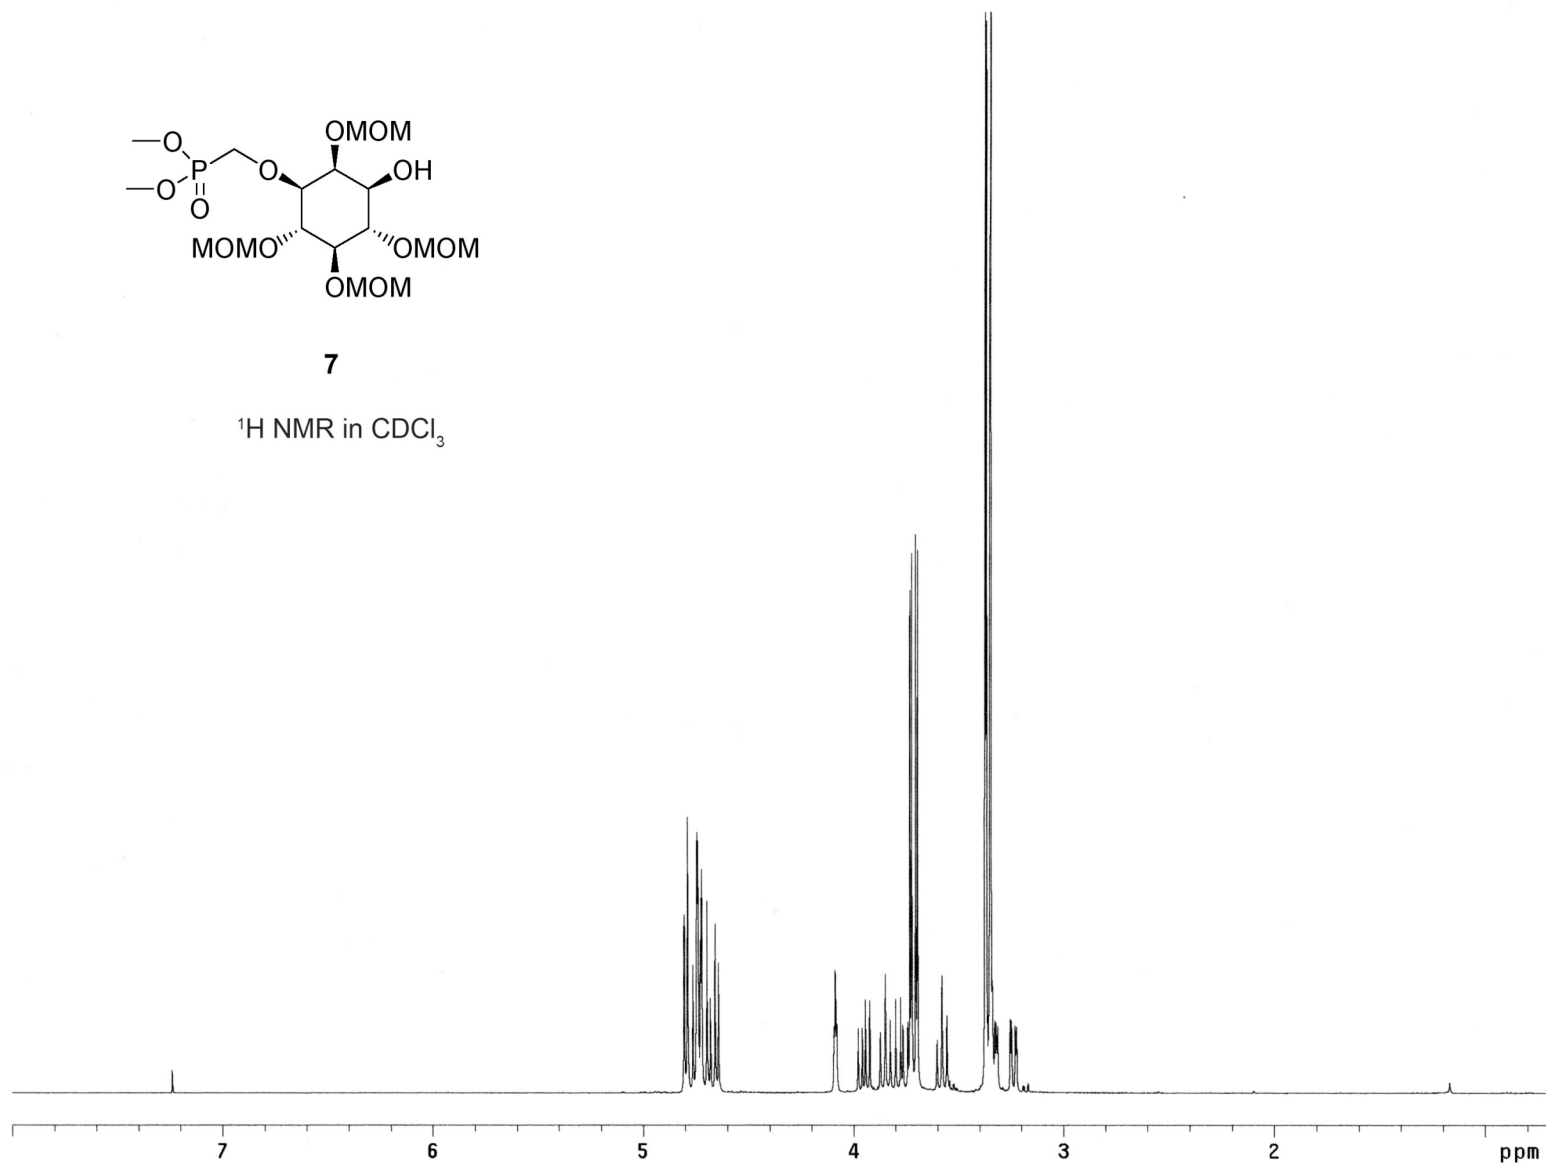

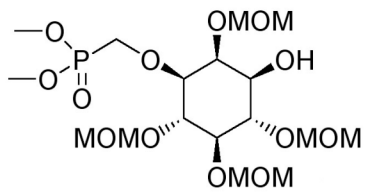

7

$^{13}\text{C}$  NMR in  $\text{CDCl}_3$

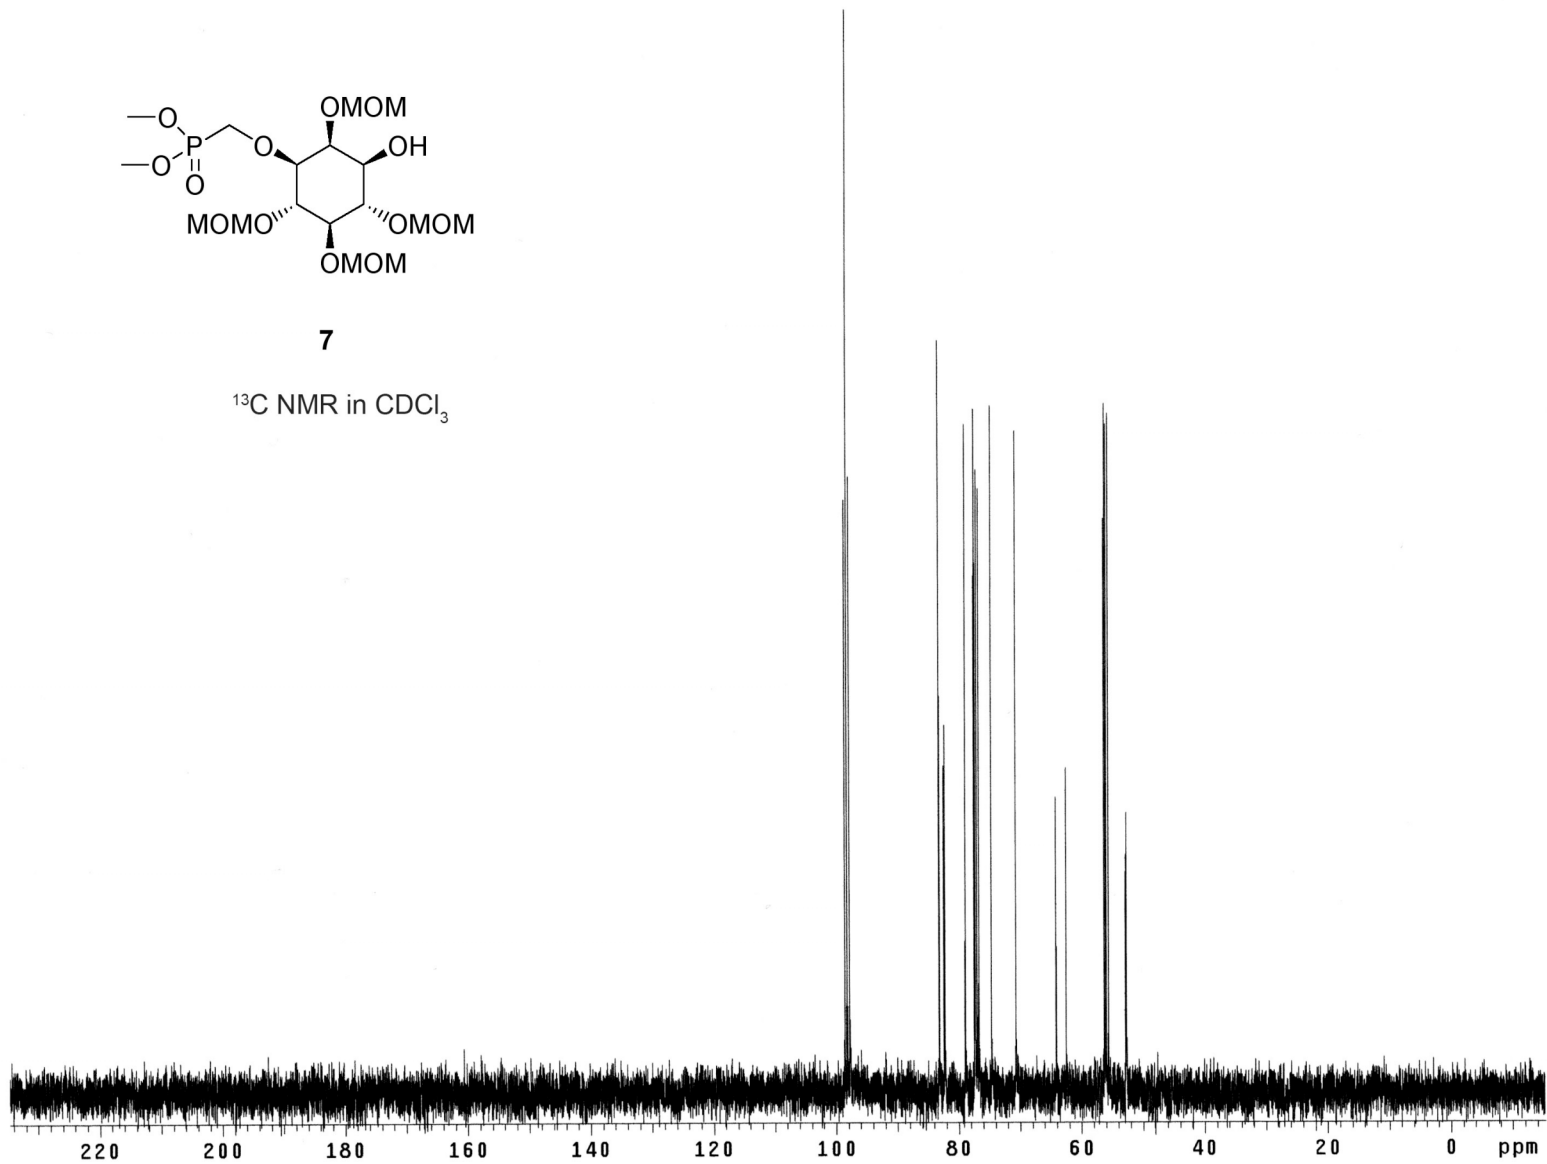

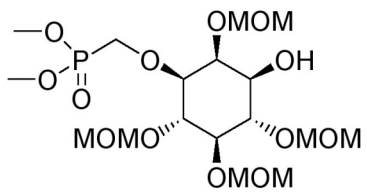

7

<sup>31</sup>P NMR in CDCl<sub>3</sub>

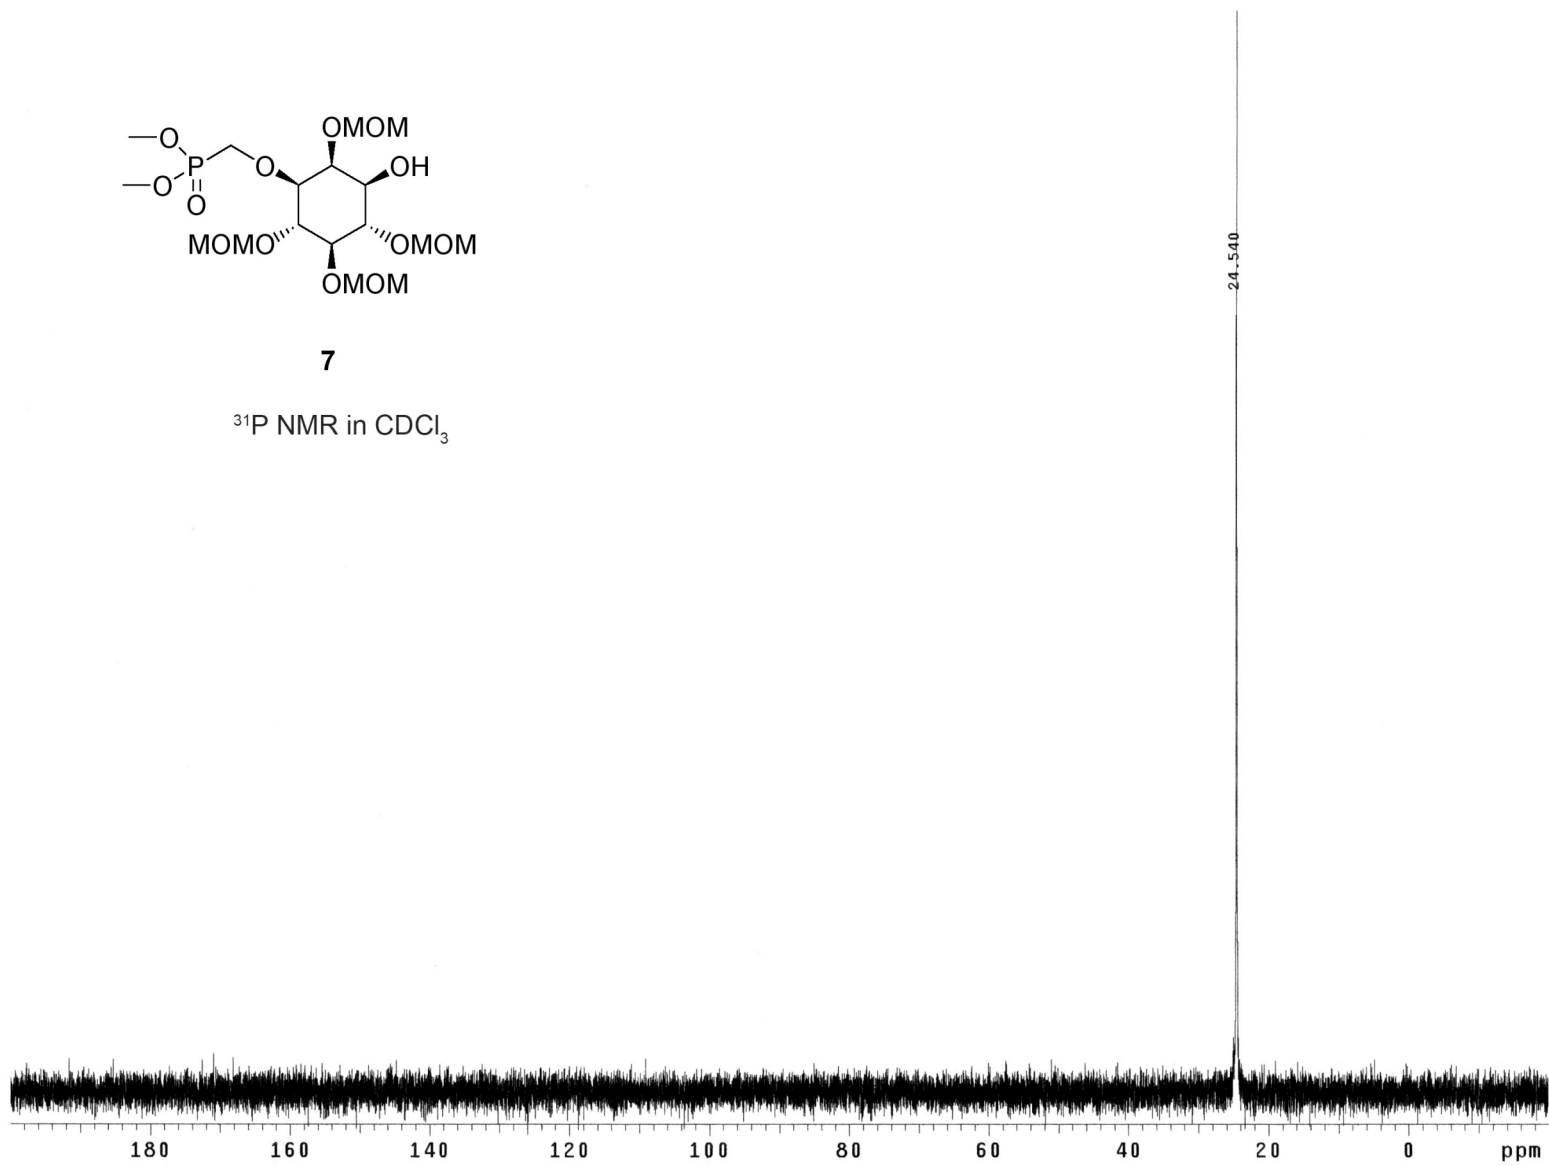

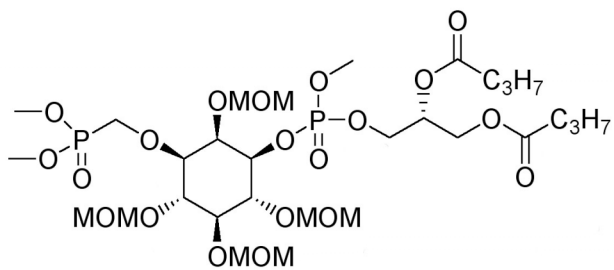

8

<sup>1</sup>H NMR in CDCl<sub>3</sub>

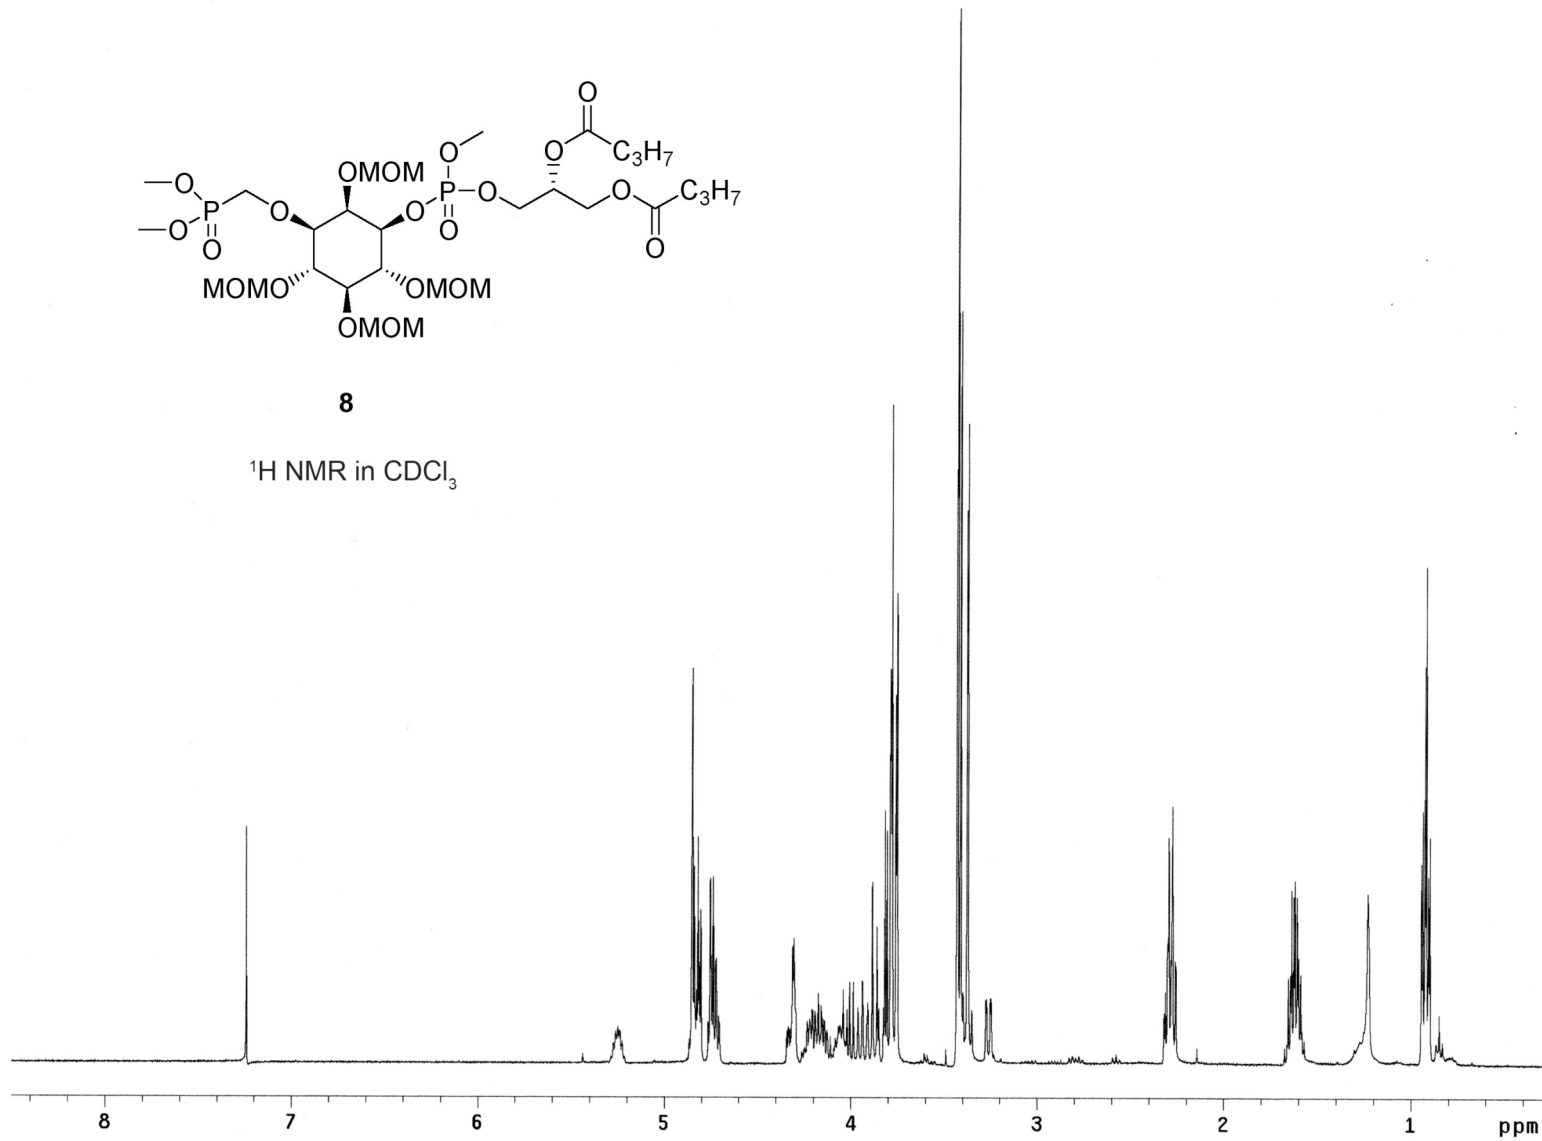

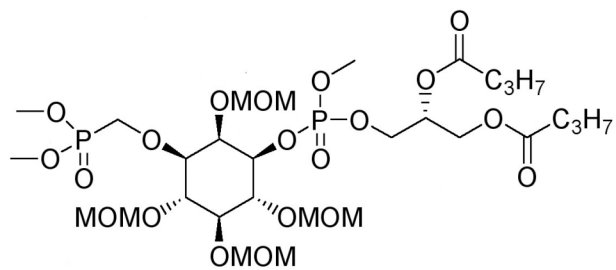

8

$^{13}\text{C}$  NMR in  $\text{CDCl}_3$

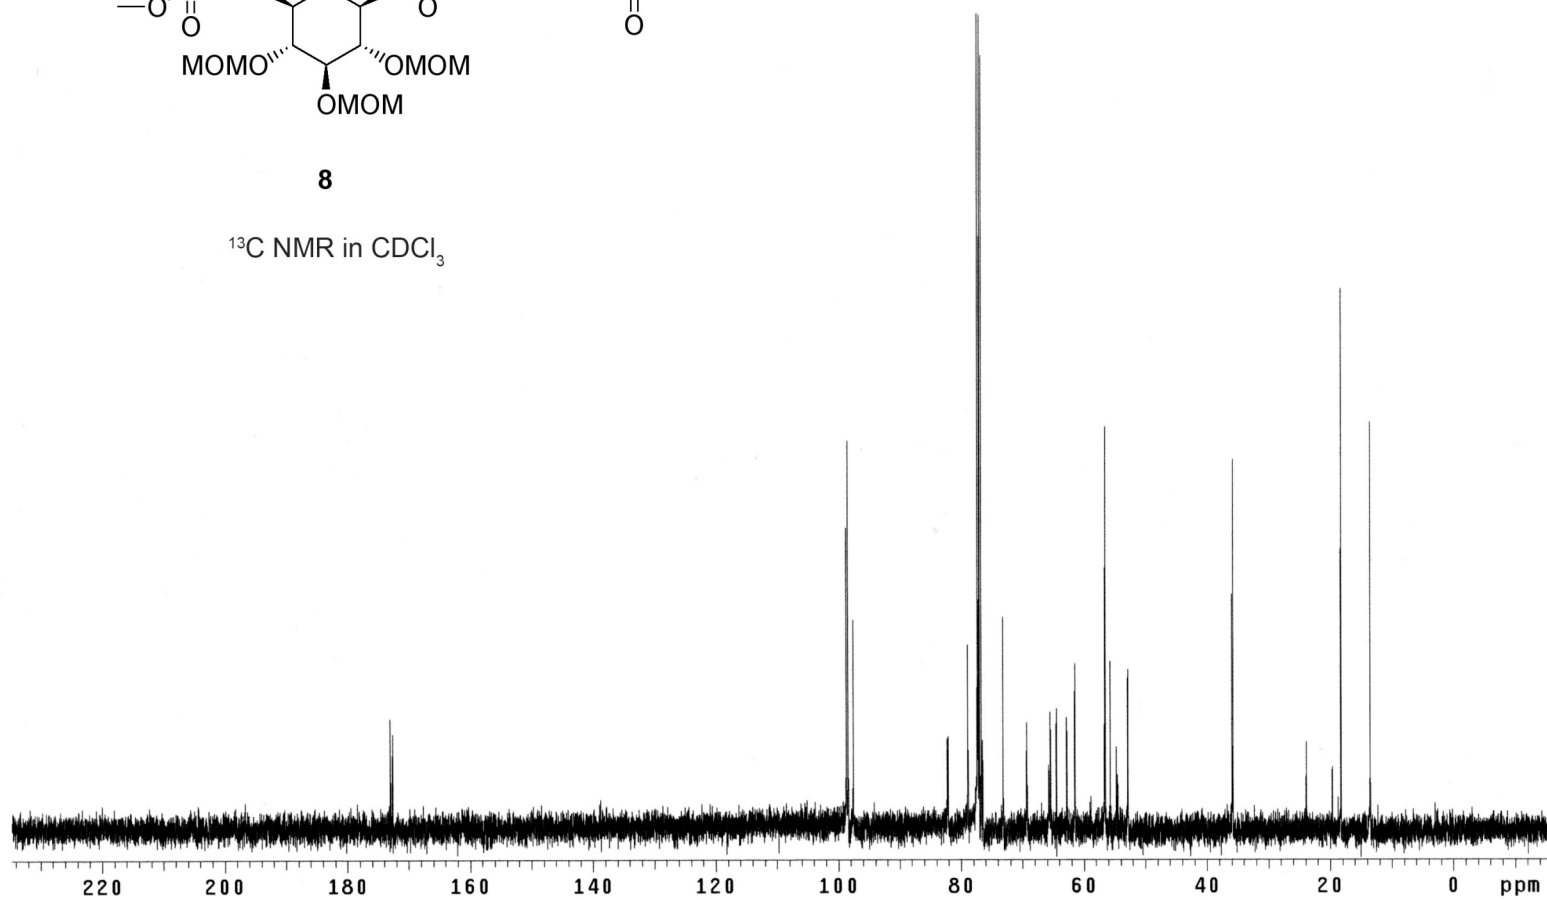



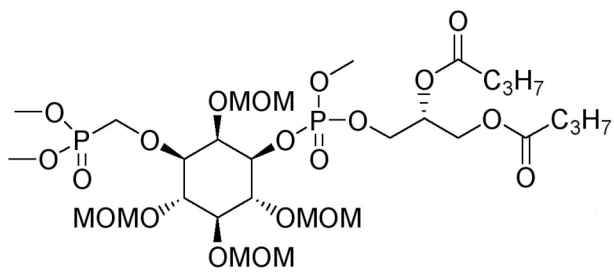

8

$^{31}\text{P}$  NMR in  $\text{CDCl}_3$

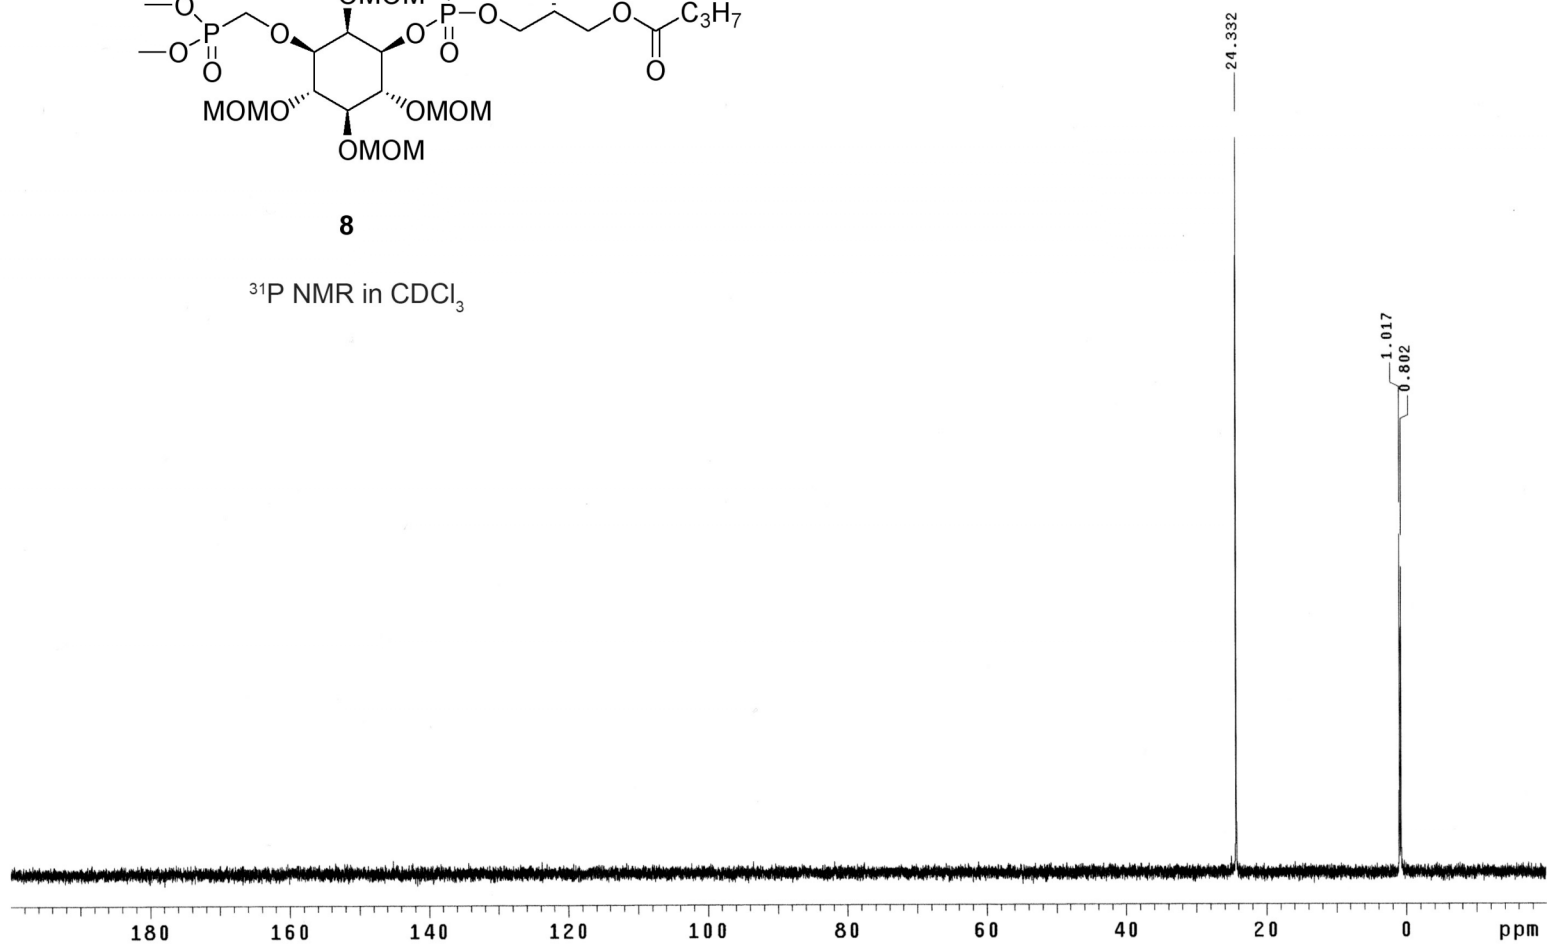

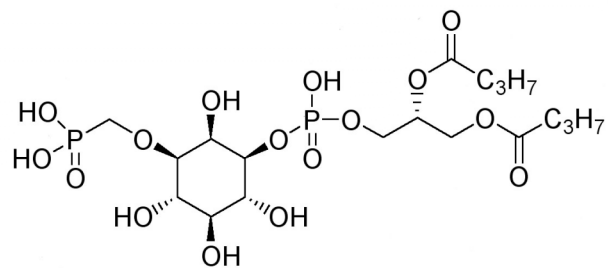

9

$^1\text{H}$  NMR in  $\text{CDCl}_3 / \text{CD}_3\text{OD}$  3:1

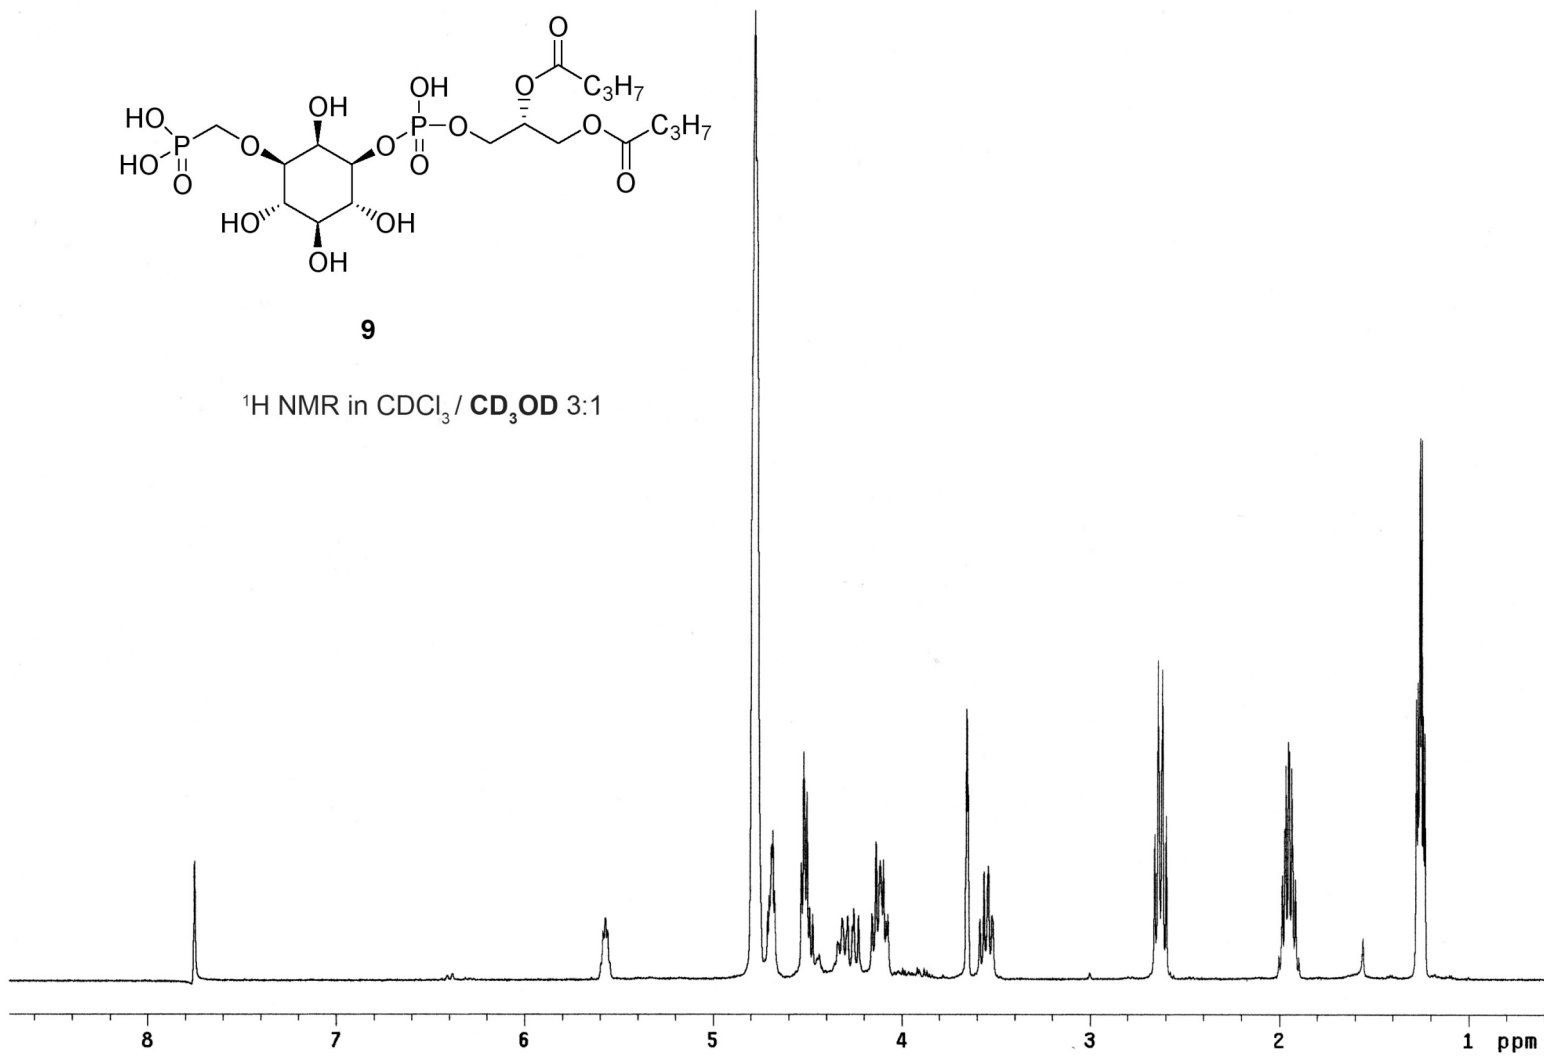

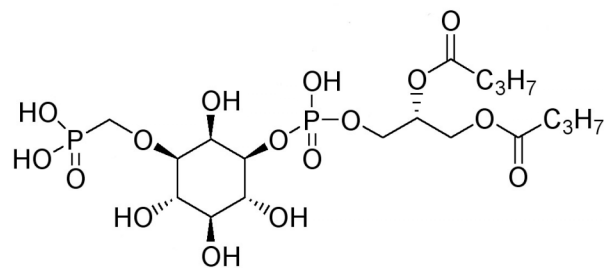

9

$^{13}\text{C}$  NMR in  $\text{CDCl}_3 / \text{CD}_3\text{OD}$  3:1

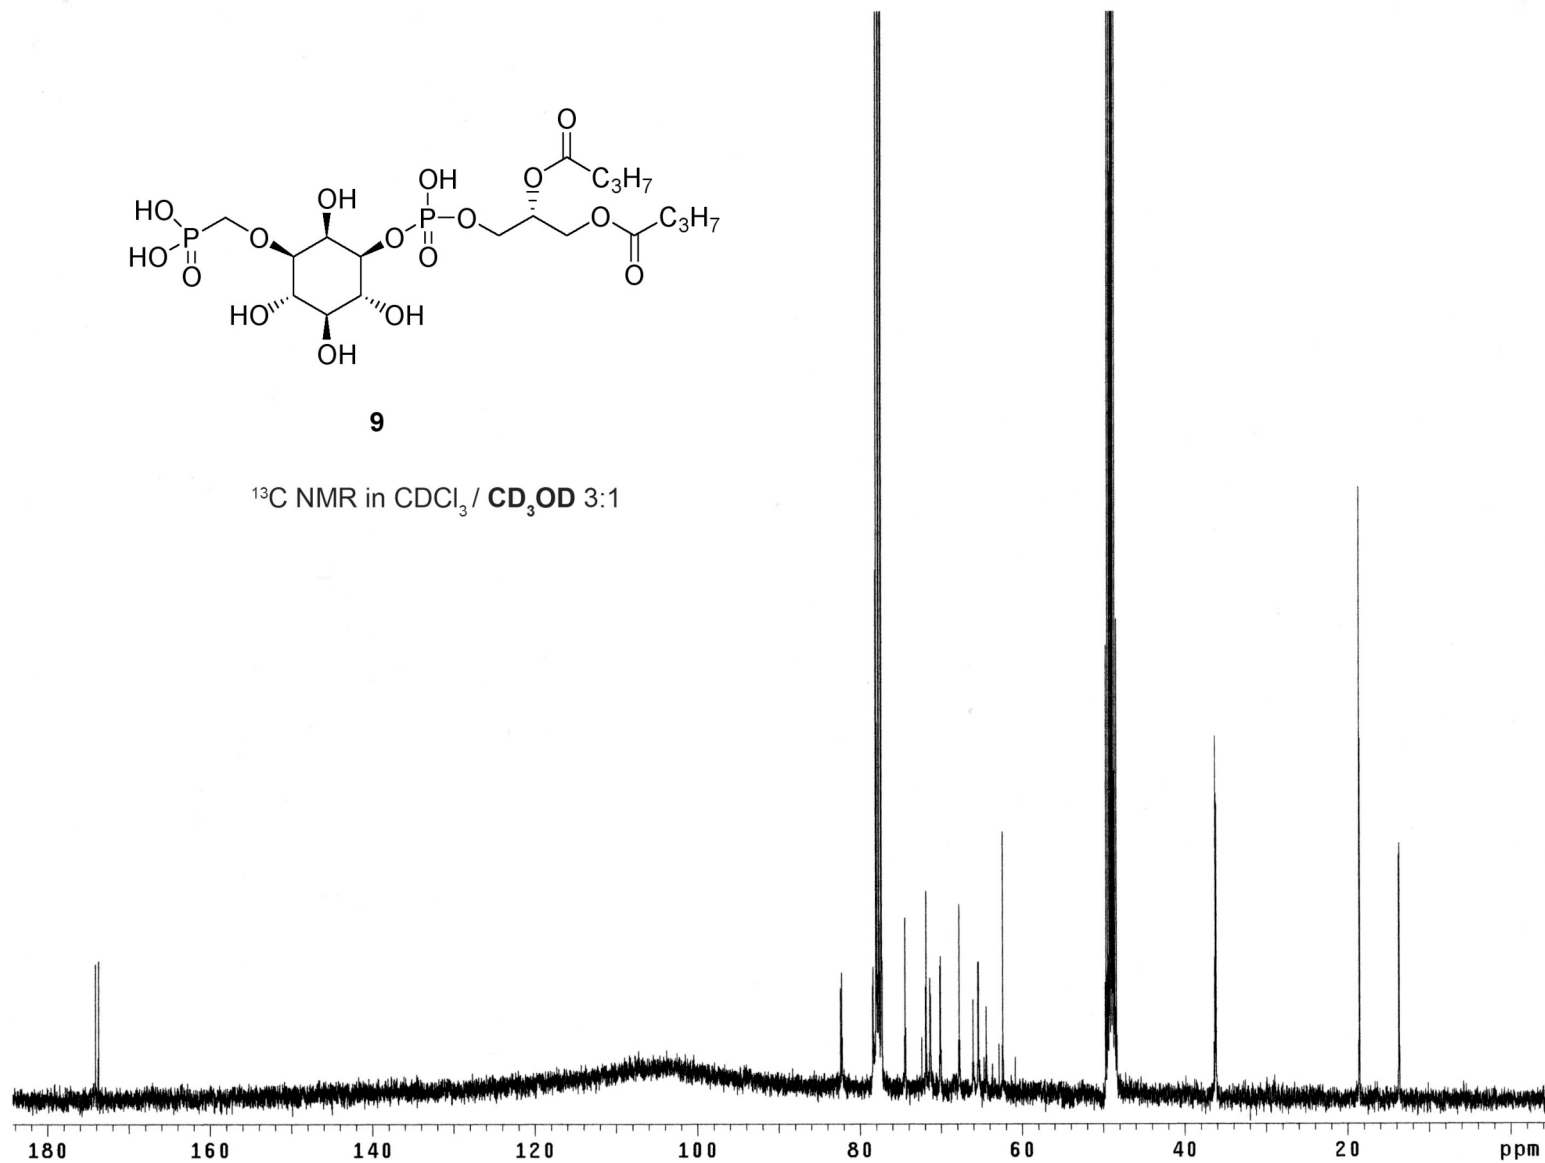

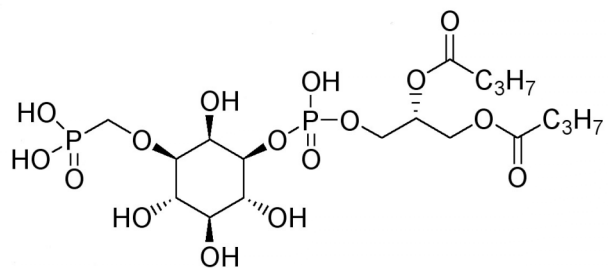

9

$^{31}\text{P}$  NMR in  $\text{CDCl}_3 / \text{CD}_3\text{OD}$  3:1

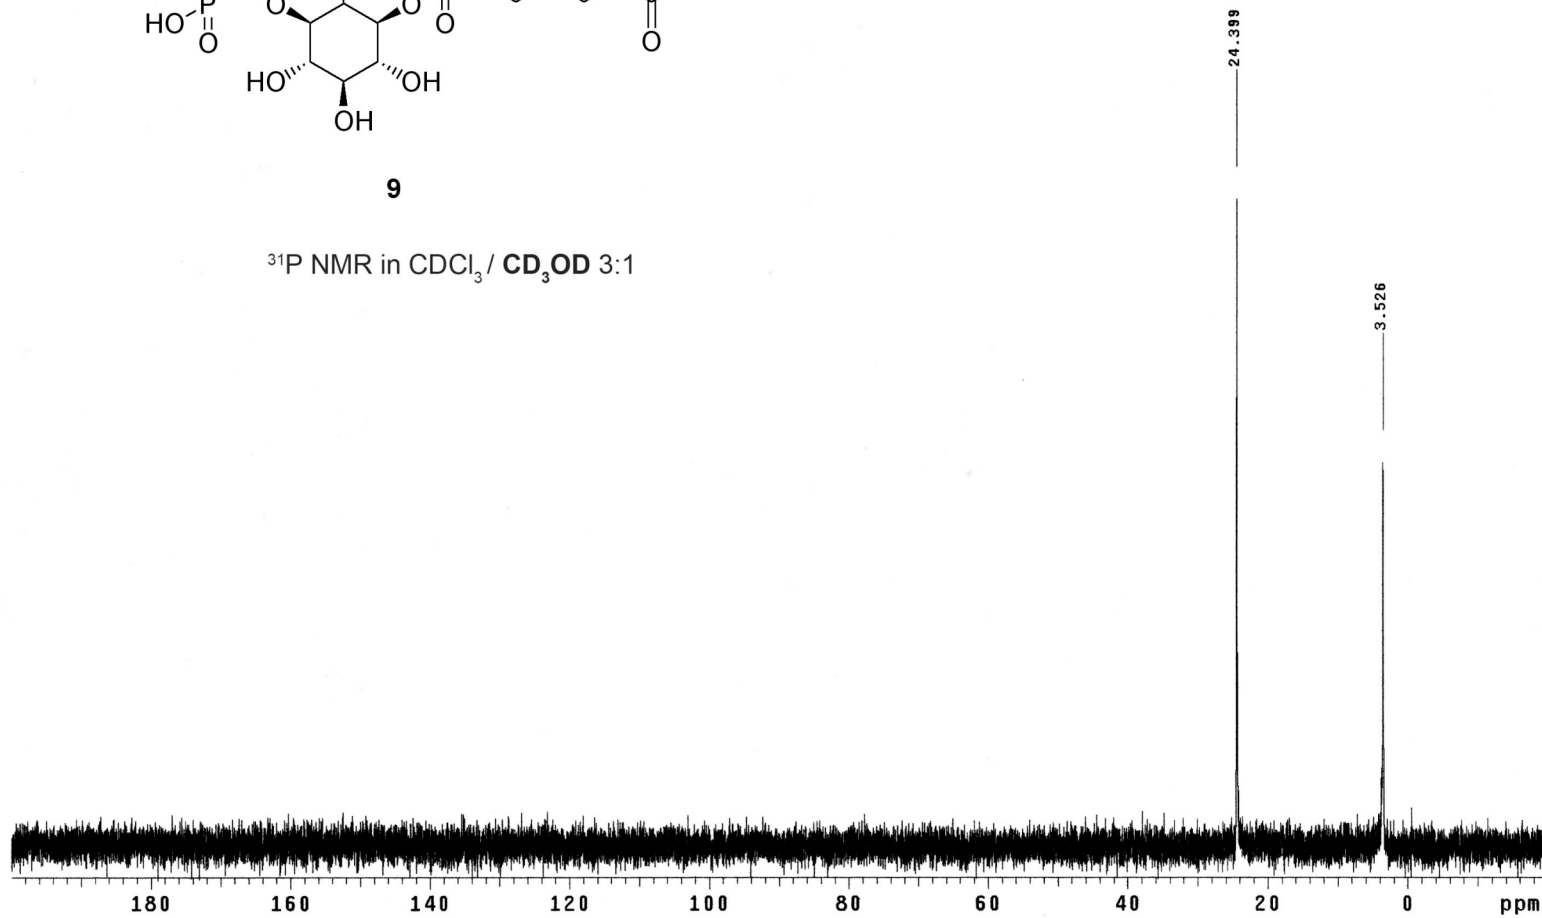

Supplement: NIHMS63805-supplement-2si20060509_12.pdf [file NIHMS63805-supplement-2si20060509_12.pdf]
